# Cardiac interoception is enhanced in blind individuals

Dominika Radziun<sup>1</sup>, Maksymilian Korczyk<sup>2</sup>, Laura Crucianelli<sup>1</sup>, Marcin Szwed<sup>2</sup>, H. Henrik Ehrsson<sup>1\*</sup>

<sup>1</sup> Department of Neuroscience, Karolinska Institutet, Stockholm, Sweden

<sup>2</sup> Institute of Psychology, Jagiellonian University, Kraków, Poland

E-mails: dominika.radziun@ki.se (DR); maksymilian.korczyk@doctoral.uj.edu.pl (MK); laura.crucianelli@ki.se (LC); m.szwed@uj.edu.pl (MS); henrik.ehrsson@ki.se (HHE)

Keywords: blindness; cross-modal plasticity; heartbeat perception; interoception; metacognition

## 26 **Abstract**

27

28 Blind individuals have superior abilities to perform perceptual tasks that rely on exteroceptive  
29 information, since visual deprivation is associated with massive cross-modal plasticity.  
30 However, it is unknown whether neuroplasticity after visual loss also affects interoception, i.e.,  
31 the sensations arising from one's inner organs that convey information about the physiological  
32 state of the body. Herein, we examine the influence of blindness on cardiac interoception, which  
33 is an interoceptive submodality that has important links to emotional processing and bodily  
34 self-awareness. We tested 36 blind and 36 age- and sex-matched sighted volunteers and  
35 examined their cardiac interoceptive ability using a well-established heartbeat counting task.  
36 The results showed that blind individuals had significantly higher accuracy in perceiving their  
37 heartbeat than did individuals in a matched sighted control group. In contrast, there were no  
38 significant differences between the groups in the metacognitive dimensions of cardiac  
39 interception or the purely physiological measurement of heart rate, thereby underscoring that  
40 the improved accuracy likely reflects a superior perceptual sensitivity to cardiac interoceptive  
41 signals in blind individuals. We conclude that visual deprivation leads to enhanced  
42 interoception, which has important implications for the study of the extent of massive cross-  
43 modal plasticity after visual loss, understanding emotional processing in blind individuals, and  
44 learning how bodily self-awareness can develop and be sustained in the absence of visual  
45 experience.

46

47

48

49

50

## 51 **Introduction**

52

53           Lack and loss of vision are associated with massive cross-modal plasticity (see Frasnelli,  
54 Collignon, Voss, & Lepore, 2011). Neuroplasticity, which occurs after sensory deprivation, can  
55 lead to enhancements within one or more senses to compensate for the lack of another sense  
56 (see Merabet & Pascual-Leone, 2010; Renier, De Volder, & Rauschecker, 2014; Singh,  
57 Phillips, Merabet, & Sinha, 2018). In line with this, numerous studies have found that blind  
58 individuals show superior performance on perceptual tasks that involve processing  
59 exteroceptive information, i.e., stimuli originating outside of the body. Within the auditory  
60 modality, blind individuals have been found to have enhanced abilities in spatial hearing both  
61 in near (Lessard, Paré, Lepore, & Lassonde, 1998; Röder et al., 1999) and far space (Voss et al.  
62 2004; Battal, Occelli, Bertonati, Falagiarda, & Collignon, 2020), as well as superior pitch  
63 discrimination (Gougoux et al., 2004). In the case of the tactile modality, blind individuals have  
64 been shown to have enhanced acuity (Goldreich & Kanics, 2006; Wan, Wood, Reutens, &  
65 Wilson, 2010), as well as superior tactile symmetry perception (Bauer et al. 2015). Finally, in  
66 the olfactory modality, blind individuals have been found to have a lower odor detection  
67 threshold (Cuevas et al., 2010; Beaulieu-Lefebvre, Schneider, Kupers, & Ptito, 2011; but see  
68 also Sorokowska, 2016). All these sensory enhancements facilitate blind people’s interactions  
69 with “the outside”, i.e., the external environment. However, interoception, i.e., sensing oneself  
70 from “the inside”, which is crucially important for maintaining bodily awareness and emotional  
71 processing, has not yet been investigated in blind individuals.

72           Interoception, in its classic definition, is the sense of the internal state of the body, which  
73 originates from the visceral organs (see Sherrington, 1948). More recent accounts frame  
74 interoceptive signals more broadly, including stimuli transmitted through lamina I of the spinal  
75 cord, e.g., sharp and burning pain, innocuous warmth and cold, itch, or affective touch, which

76 is information that helps the organism maintain an optimal internal state through homeostatic  
77 mechanisms (see Purves et al., 2019; see also Craig, 2002; Björnsdotter, Morrison, & Olausson,  
78 2010; Fotopoulou & Tsakiris, 2017; Crucianelli & Ehrsson, 2022). Among the interoceptive  
79 submodalities, the heartbeat is one of the most studied signals (see Khalsa et al., 2018). Cardiac  
80 interoception is believed to play an important role in bodily awareness (Herbert & Pollatos,  
81 2012) and emotional functioning (Critchley & Garfinkel, 2017). Alterations in this  
82 interoceptive submodality have been described in autism (Garfinkel et al., 2016a) and  
83 schizophrenia (Ardizzi et al., 2016).

84         This experiment aims to investigate the potential influence of blindness on cardiac  
85 interoception. To quantify the objective ability to perceive heartbeats, we used the classical  
86 heartbeat counting task (Schandry, 1981). Furthermore, to gain a richer understanding of  
87 cardiac interoception both at the perceptual and metacognitive levels, the present article follows  
88 the dimensional model of interoception introduced by Garfinkel and colleagues (2015; see  
89 Suksasilp and Garfinkel [2022] for the revision of the model). This model distinguishes three  
90 major dimensions of interoception. The first is interoceptive accuracy, which is an objective  
91 performance on a behavioral test consisting of monitoring one's own physiological events. In  
92 this paper, this concept refers to the accuracy in the heartbeat counting task (Schandry, 1981),  
93 in which individuals count their heartbeats for a given amount of time. The second is  
94 interoceptive sensibility, which is the participant's assessment of their own interoceptive  
95 experiences as obtained by self-report. In this paper, this concept is defined as the result of the  
96 Multidimensional Assessment of Interoceptive Awareness [Mehling et al., 2012] questionnaire,  
97 which is a measure relating to a spectrum of internal bodily sensations. The third is interoceptive  
98 awareness, which is the degree to which interoceptive accuracy correlates with confidence in  
99 task response. In this paper, this concept is defined as the correlation between heartbeat  
100 counting task performance and the confidence ratings obtained after every trial of the task.

101 Additionally, to examine another dimension of participants' reflection on their abilities, we  
102 obtained the participants' beliefs about their performance both before and after completing the  
103 task. Some interoceptive dimensions have been found to correspond, and others to dissociate,  
104 with the dissociations being especially prevalent in clinical populations (e.g., Garfinkel et al.,  
105 2016a; Palser, Fotopoulou, Pellicano, & Kilner, 2018, 2020; Jakubczyk et al., 2019; Rae,  
106 Larsson, Garfinkel, & Critchley, 2019). Therefore, investigating all the dimensions of  
107 interoception instead of one (for example, accuracy only) is important for discussing potential  
108 clinical implications of the study.

109         Given the existence of reports showing the involvement of somatosensory  
110 mechanoreceptors in cardioception (Macefield, 2003; Knapp-Kline, Ring, Emmerich, &  
111 Brener, 2021), we also included a control task, namely, the grating orientation task, which is a  
112 well-established measure of tactile acuity (Johnson & Phillips, 1981). By including this task,  
113 we could assess to what extent the potential difference in the ability to detect heartbeats is  
114 specific to cardiac interoceptive accuracy itself and not due to the influence of superior tactile  
115 acuity of blind participants (e.g., Goldreich & Kanics, 2003; Alary et al., 2009).

116         Our study is, we believe, the first to look at the relationship between blindness and  
117 cardiac interoception, as well as visceral interoception in general. Our hypothesis was that  
118 cardiac interoception is enhanced in blind individuals and, thus, that blind individuals would  
119 perform better than sighted individuals in the heartbeat counting task. We did not have specific  
120 predictions regarding the remaining interoceptive dimensions, as these were included for  
121 exploratory purposes. The overarching goal of this study was to take the first step toward  
122 understanding how the absence of vision influences interoception, which could have important  
123 implications for advancing our understanding of the role of visual experience in bodily self-  
124 awareness and emotional processing.

125

## 126 **Methods**

127

## 128 **Participants**

129

130 Thirty-six blind and 36 sighted individuals (age range: 22-45 years, mean age: 33.42  
131 years in the blind group, 33.19 in the sighted group; 19 males and 17 females per group)  
132 participated in the study. A sighted, sex- and age-matched participant was recruited for each  
133 blind participant. Both blind and sighted participants were invited to take part in the study  
134 through multiple recruitment channels to make the samples representative and to balance any  
135 potential bias one channel might introduce. All subjects reported that they had no additional  
136 sensory or motor disabilities. The exclusion criteria included having a history of neurological  
137 or psychiatric disorders.

138 For all blind participants, blindness was attributed to peripheral origin and was not  
139 associated with other sensory impairments. The inclusion criteria were complete blindness or  
140 minimal light sensitivity with no ability to functionally use this sensation, as well as no pattern  
141 vision. Blind participants' characteristics are presented in Table 1.

142

143 **Table 1.** Participant characteristics.

| <b>Participant</b> | <b>Age</b><br><b>(years)</b> | <b>Sex</b> | <b>Cause of blindness</b>  | <b>Age at blindness onset</b> | <b>Reading hand</b><br><b>(finger)</b> |
|--------------------|------------------------------|------------|----------------------------|-------------------------------|----------------------------------------|
| <b>1</b>           | 24                           | male       | atrophy of the optic nerve | congenitally blind            | left (index finger)                    |
| <b>2</b>           | 26                           | male       | retinopathy of prematurity | congenitally blind            | left                                   |
| <b>3</b>           | 37                           | female     | retinopathy of prematurity | congenitally blind            | right                                  |
| <b>4</b>           | 28                           | female     | retinopathy of prematurity | congenitally blind            | right                                  |
| <b>5</b>           | 25                           | male       | retinopathy of prematurity | congenitally blind            | left                                   |
| <b>6</b>           | 34                           | male       | undefined (genetic)        | congenitally blind            | left                                   |

|    |    |        |                            |                    |                      |
|----|----|--------|----------------------------|--------------------|----------------------|
| 7  | 32 | female | retinopathy of prematurity | congenitally blind | left                 |
| 8  | 43 | male   | atrophy of the optic nerve | congenitally blind | left (index finger)  |
| 9  | 31 | male   | retinopathy of prematurity | congenitally blind | right                |
| 10 | 32 | female | retinopathy of prematurity | congenitally blind | right (index finger) |
| 11 | 40 | female | atrophy of the optic nerve | congenitally blind | right (index finger) |
| 12 | 39 | female | retinopathy of prematurity | congenitally blind | left (index finger)  |
| 13 | 40 | female | retinopathy of prematurity | congenitally blind | left                 |
| 14 | 30 | female | atrophy of the optic nerve | congenitally blind | right                |
| 15 | 30 | male   | optic nerve hypoplasia     | congenitally blind | right                |
| 16 | 39 | male   | retinopathy of prematurity | congenitally blind | left                 |
| 17 | 27 | male   | retinopathy of prematurity | congenitally blind | right                |
| 18 | 45 | female | retinopathy of prematurity | congenitally blind | left                 |
| 19 | 45 | male   | retinopathy of prematurity | congenitally blind | left                 |
| 20 | 22 | male   | microphthalmia             | congenitally blind | left                 |
| 21 | 45 | female | retinopathy of prematurity | congenitally blind | right (index finger) |
| 22 | 31 | female | atrophy of the optic nerve | congenitally blind | right (index finger) |
| 23 | 31 | male   | retinopathy of prematurity | congenitally blind | left                 |
| 24 | 35 | female | congenital glaucoma        | congenitally blind | both                 |
| 25 | 23 | male   | atrophy of the optic nerve | congenitally blind | left (index finger)  |
| 26 | 22 | male   | retinopathy of prematurity | congenitally blind | left (index finger)  |
| 27 | 33 | male   | atrophy of the optic nerve | congenitally blind | left (index finger)  |
| 28 | 29 | male   | retinopathy of prematurity | congenitally blind | left (index finger)  |
| 29 | 36 | female | undefined (genetic)        | congenitally blind | right (index finger) |
| 30 | 42 | male   | toxoplasmosis              | congenitally blind | right (index finger) |
| 31 | 35 | female | undefined (genetic)        | congenitally blind | right (index finger) |
| 32 | 40 | male   | eye injury                 | 3                  | right (index finger) |
| 33 | 23 | female | glaucoma                   | 4                  | left (middle finger) |
| 34 | 26 | female | retinal detachment         | 17                 | left (index finger)  |
| 35 | 38 | male   | glaucoma                   | 21                 | right (index finger) |
| 36 | 45 | female | eye injury                 | 23                 | left (index finger)  |

145 The study was approved by the Jagiellonian University Ethics Committee. All  
146 participants provided written informed consent before the study and were compensated for their  
147 time; blind participants' travel expenses were reimbursed. The documents were read to blind  
148 participants by the experimenter, and the signature location was indicated with tactile markers.  
149

## 150 **Experimental tasks and procedure**

151  
152 All volunteers were naïve to the experimental procedure. At the very beginning of the  
153 experiment and prior to the behavioral tasks, the participants were asked to fill out a  
154 questionnaire regarding their bodily experiences. Since increased physiological arousal has  
155 been shown to provide an advantage for heartbeat perception (Pollatos, Herbert, Kaufmann,  
156 Auer, & Schandry, 2007), to allow for any potentially elevated heart rates due to walking at a  
157 fast pace to the building, etc., to return to a normal level, we asked the participants to fill out  
158 the questionnaire at the beginning rather than the end of the procedure. The Multidimensional  
159 Assessment of Interoceptive Awareness (MAIA; Mehling et al., 2012; see Brytek-Matera &  
160 Koziel, 2015 for a Polish translation and validation) is a 32-item tool that measures  
161 interoceptive body awareness, which consists of eight subscales, namely, *Noticing*, *Not-*  
162 *Distracting*, *Not-Worrying*, *Attention Regulation*, *Emotional Awareness*, *Self-Regulation*, *Body*  
163 *Listening*, and *Trusting*; the questionnaire has a range of scores of 0-5, with 0 indicating low  
164 and 5 indicating high interoceptive body awareness. For the same reason as that described  
165 above, i.e., to prevent potentially elevated heart rates, the participants were also asked not to  
166 consume any caffeinated drinks on the day of the experiment (see Hartley, Lovallo, & Whitsett,  
167 2004; McMullen, Whitehouse, Shine, Whitton, & Towell, 2012).

168 Before the start of the behavioral part of the experiment, all the participants were  
169 informed about the experimental setup and received a short description of the procedure. Then,



170 each participant sat on a chair in a comfortable position. A heart rate baseline reading was  
171 obtained over a period of 5 minutes before the beginning of the counting task. The participants’  
172 heart rate was recorded using a Biopac MP150 BN-PPGED pulse oximeter (Goleta, CA, United  
173 States) attached to their left index finger and connected to a laptop with AcqKnowledge  
174 software (version 5.0), which recorded the number of heartbeats after the preset time. Then, the  
175 number of heartbeats was quantified using the embedded ‘count peaks’ function. To reduce the  
176 possibility that participants would perceive pulsation in their fingers due to the grip of the pulse  
177 oximeter, attention was given to ensure a comfortable and not overly tight fit of the finger cuff.  
178 Sighted subjects were blindfolded while performing the tasks.

179 Participants were given the following instructions: “Without manually checking, can  
180 you silently count each heartbeat you feel in your body from the time you hear ‘start’ to when  
181 you hear ‘stop’? Do not take your pulse or feel on your chest with your hand. You are only  
182 allowed to feel the sensation of your heart beating” (adapted from Garfinkel et al., 2015). After  
183 the trial, the participants verbally reported the number of heartbeats counted. They did not  
184 receive any feedback regarding their performance. Immediately after reporting the number of  
185 counted heartbeats, participants were asked to rate their confidence in the perceived accuracy  
186 of their response (see Garfinkel et al., 2015). This confidence judgment was made using a scale  
187 ranging from 0 (total guess/no heartbeat awareness) to 10 (complete confidence/full perception  
188 of heartbeat). A rest period of 30 seconds was given before the next trial began. The task was  
189 repeated six times to form six trials, using intervals of 25, 30, 35, 40, 45 and 50 seconds,  
190 presented in a random order. The participants received no information about the interval length.

191 To examine an additional dimension of metacognitive reflection, namely, prior and  
192 posterior beliefs of one’s performance (see Fleming, Massoni, Gajdos, & Vergnaud, 2016;  
193 Kirsch et al., 2021), after receiving the instruction of the task and being given an opportunity  
194 to ask clarifying questions, the participants were also asked to assess their prospective

195 performance in the task in relation to all trials. Thus, before the task, they were given the  
196 following instruction: *Now that I explained you the task, how well are you going to perform in*  
197 *the task on a scale ranging from 0 (not so well/total guess) to 100 (very well/very accurate)?*  
198 After completing the task, participants were asked to reflect on their performance in all trials  
199 and were given the following instructions: *Now that you have done the task, how well did you*  
200 *perform in the task on a scale ranging from 0 (not so well/total guess) to 100 (very well/very*  
201 *accurate)?* These data were analyzed separately from the confidence judgments provided after  
202 every trial.

203 To examine a potential relationship between interoceptive and tactile abilities, we also  
204 employed a measure of tactile acuity, namely, the grating orientation task (Johnson & Phillips,  
205 1981). The procedure followed the method described in Radziun et al. (2021; see also  
206 Supplementary Material). The grating orientation threshold was calculated by linear  
207 interpolation between grating widths spanning 75% correct responses (see Van Boven &  
208 Johnson, 1994; Merabet et al., 2008; Wong, Gnanakumaran, & Goldreich, 2011; Garfinkel et  
209 al. 2016b). Nine participants from the blind group and 12 participants from the sighted group  
210 were excluded from the data analysis because they could not perform the task beyond the  
211 expected level (75% accuracy).

212 After completing the tasks described in this study, the same participants also took part  
213 in two other behavioral experiments that examined body perception, which is not related to the  
214 current study's research questions, and that will be reported separately (Radziun et al., in  
215 preparation).

216

## 217 **Data analysis**

218

### 219 **Interoceptive accuracy**

220

221 For each participant, an accuracy score was derived, resulting in the following formula  
222 for interoceptive accuracy across all trials (see Schandry, 1981):

223

$$224 \quad \frac{1}{6} \Sigma \left( 1 - \frac{|recorded\ heartbeats - counted\ heartbeats|}{recorded\ heartbeats} \right)$$

225

226 The interoceptive accuracy scores obtained following this transformation usually vary between  
227 0 and 1, with higher scores indicating a better discrimination of the heartbeats (i.e., smaller  
228 differences between estimated and actual heartbeats). Two blind participants who failed to  
229 perform the task were excluded from further analyses (extremely low accuracy levels of -0.128  
230 and -1.178; see also *Plan of statistical analysis*).

231

### 232 **Interoceptive sensibility**

233

234 MAIA scores served as an indication of the general interoceptive sensibility. Higher  
235 scores indicated higher interoceptive sensibility.

236

### 237 **Interoceptive awareness**

238

239 First, the mean confidence during the heartbeat detection task was calculated for every  
240 participant by averaging the confidence judgments over all the experimental trials to produce a  
241 global measure of mean confidence in perceived accuracy of response. Then, to provide an  
242 index of interoceptive awareness, a correlation coefficient between the accuracy score (see  
243 section *Interoceptive accuracy*) and the confidence ratings was calculated.

244

## 245 **Plan of statistical analysis**

246

247           The data were tested for normality using the Shapiro–Wilk test and found to be not  
248 distributed normally ( $p < .05$ ). Therefore, nonparametric statistics were used (Mann–Whitney  
249  $U$  test for independent group comparisons and Spearman’s  $\rho$  for correlations). All  $p$  values  
250 were two-tailed. Data exclusion criteria were established prior to data analysis.

251           For the Bayesian analyses, the default Cauchy prior was used.  $BF_{01}$  indicates support  
252 for the null over the alternative hypothesis, and  $BF_{10}$  indicates support for the alternative  
253 hypothesis over null hypothesis (e.g., a  $BF_{01} = 8$  means 8 times more support for the null  
254 hypothesis, while  $BF_{10} = 8$  means 8 times more support for the alternative hypothesis). BFs  
255 between 0.333 and 3 are normally considered inconclusive (Jarosz & Wiley, 2014; Lee &  
256 Wagenmakers, 2014).

257           The data were analyzed and visualized with RStudio software, version 1.3.1056, and the  
258 Bayes Factor software package, version 0.9.12-4.2.

259

## 260 **Data availability**

261

262           All data generated and analyzed during the study are available from the corresponding  
263 author upon request.

264

## 265 **Results**

266

### 267 **Interoceptive accuracy**

268

269 Our results revealed that blind individuals had better interoceptive accuracy than sighted  
270 controls, as reflected by significantly higher performance in the heartbeat counting task ( $W =$   
271  $836$ ,  $p = 0.009$ ,  $CI_{95\%} = 0.030-0.241$ ,  $BF_{10} = 10.540$ ;  $M_{Blind} = 0.779$ ,  $SD_{Blind} = 0.166$ ,  $M_{Control}$   
272  $= 0.630$ ,  $SD_{Control} = 0.237$ ; Figure 1). The baseline performance in the sighted control group was  
273 comparable to the results obtained in other studies using the heartbeat counting task paradigm  
274 (e.g.,  $M = 0.66$  in Garfinkel et al., 2015;  $M = 0.63$  in Zamariola, Maurage, Luminet, & Corneille,  
275 2018;  $M = 0.61$  in von Mohr, Finotti, Villani, & Tsakiris, 2021), which highlights that the task  
276 was successfully implemented in the present study and that the blind group showed a level of  
277 accuracy that was significantly higher than the values normally reported in the literature.

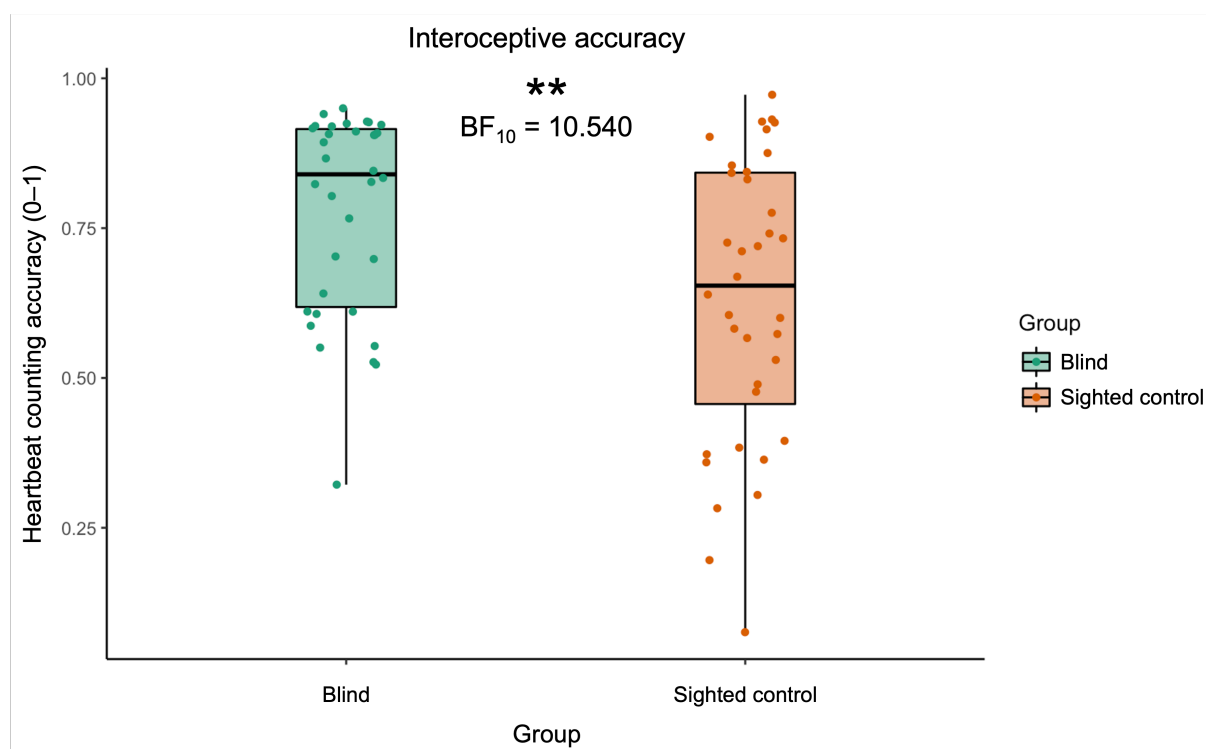

278  
279 **Figure 1.** Interoceptive accuracy, as measured using the heartbeat counting task, was elevated  
280 in blind individuals compared to sighted controls. The boxplots depict the data based on their  
281 median (thick black line) and quartiles (upper and lower ends of boxes). The vertical lines, i.e.,  
282 the whiskers, indicate the minimum or maximum values within 1.5x the interquartile range  
283 above and below the upper and lower quartiles. The datapoints outside the vertical lines are the

284 outlier observations, the furthest being the minimum or maximum values in the data. The  
285 following figures are formatted in the same fashion.

286

287         The heart rate was equivalent for both groups ( $W = 569$ ,  $p = 0.617$ ,  $CI95\% = -6.000$ –  
288  $3.400$ ,  $BF_{01} = 3.479$ ;  $M_{Blind} = 76.347$ ,  $SD_{Blind} = 10.441$ ,  $M_{Control} = 77.794$ ,  $SD_{Control} = 9.663$ ).  
289 Therefore, the potential influence of heart rate, which has been shown to be a factor that affects  
290 performance (e.g., Radziun et al., 2021), could be excluded as an explanation for the effect  
291 observed here.

292

### 293 **Interoceptive sensibility**

294

295         There was no significant difference in average MAIA scores between the groups ( $W =$   
296  $607$ ,  $p = 0.958$ ,  $CI95\% = -0.283$ – $0.323$ ,  $BF_{01} = 4.046$ ;  $M_{Blind} = 2.885$ ,  $SD_{Blind} = 0.643$ ,  $M_{Control}$   
297  $= 2.900$ ,  $SD_{Control} = 0.561$ ; Figure 2), which shows that there was no difference in subjective  
298 interoceptive sensibility between the blind group and the sighted control group. No significant  
299 differences between the groups emerged when comparing the MAIA subscales separately (all  
300  $p > 0.05$ ).

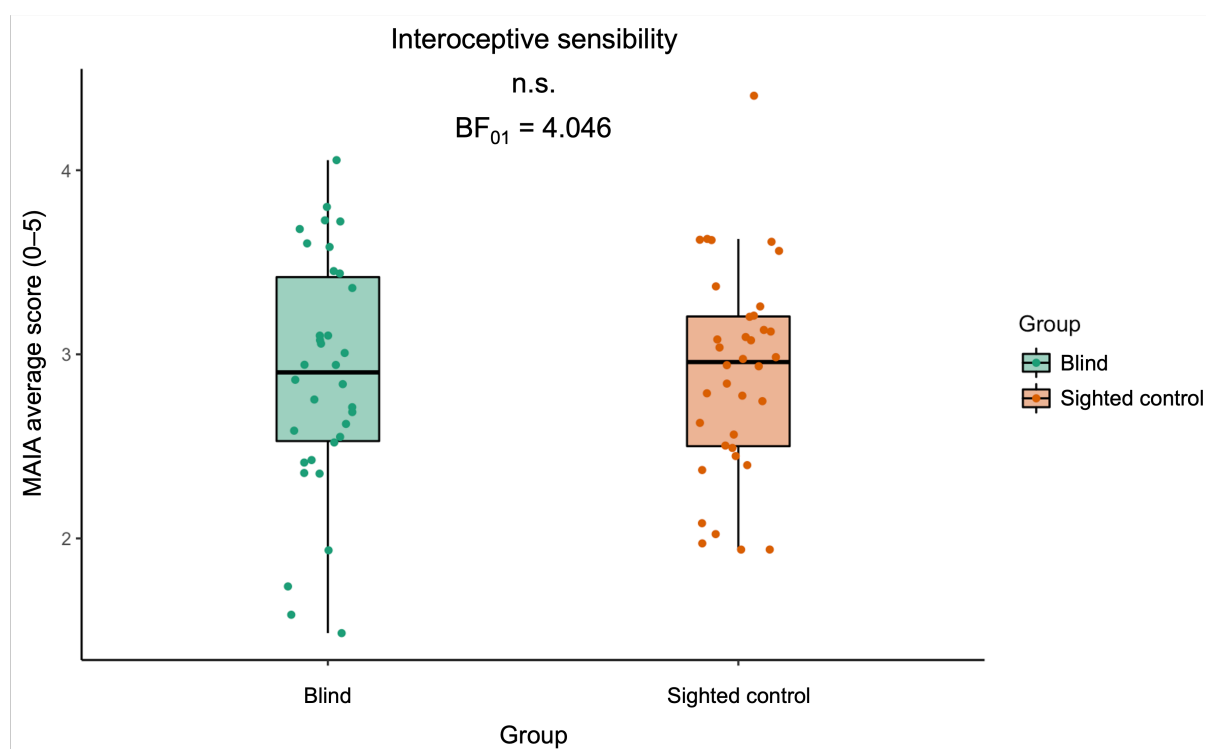

301

302 **Figure 2.** There was no difference between the blind group and the sighted control group in  
303 interoceptive sensibility, as measured with the Multidimensional Assessment of Interoceptive  
304 Awareness (MAIA).

305

306 Interoceptive sensibility, as measured by the MAIA, and interoceptive accuracy did not  
307 correlate in either the blind group ( $\rho = 0.183$ ,  $p = 0.298$ ,  $CI_{95\%} = -0.165-0.491$ ,  $BF_{01} = 2.223$ )  
308 or the sighted controls ( $\rho = 0.253$ ,  $p = 0.136$ ,  $CI_{95\%} = -0.082-0.537$ ,  $BF_{01} = 1.517$ ), which  
309 suggests that subjectively reported sensitivity to bodily sensations does not align with objective  
310 interoceptive accuracy regardless of the visual experience; this follows a pattern that has been  
311 observed in previous studies (e.g., Mai, Wong, Georgiou, & Pollatos, 2018).

312

### 313 Interoceptive awareness

314

315 In the blind group, we did not find a significant correlation between interoceptive  
316 accuracy, as measured by heartbeat counting task, and interoceptive sensibility, as measured by

317 the average confidence ratings ( $\varrho = 0.277$ ,  $p = 0.113$ ,  $CI95\% = -0.067-0.563$ ,  $BF_{01} = 0.362$ ;  
318 Figure 3A). However, this correlation was found in the sighted control group ( $\varrho = 0.484$ ,  $p =$   
319  $0.003$ ,  $CI95\% = 0.185-0.701$ ,  $BF_{10} = 39.449$ ; Figure 3B).

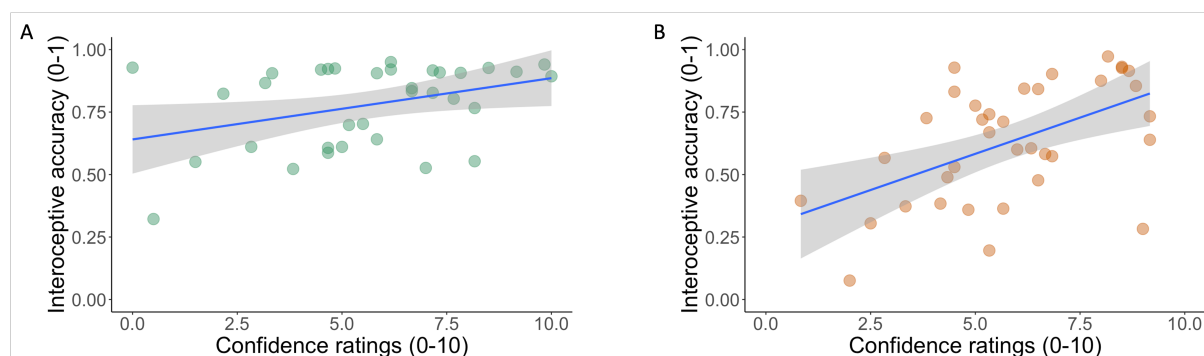

320

321 **Figure 3.** Confidence–accuracy correlation in the blind group (A) and the sighted control (B)  
322 group.

323

324 Notably, there was no significant difference in the mean confidence ratings between the  
325 blind group and the sighted control group ( $W = 601.5$ ,  $p = 0.906$ ,  $CI95\% = -1.333-1.000$ ,  $BF_{01}$   
326  $= 3.881$ ;  $M_{\text{Blind}} = 5.637$ ,  $SD_{\text{Blind}} = 2.501$ ,  $M_{\text{Control}} = 5.819$ ,  $SD_{\text{Control}} = 2.145$ ; Figure 4).

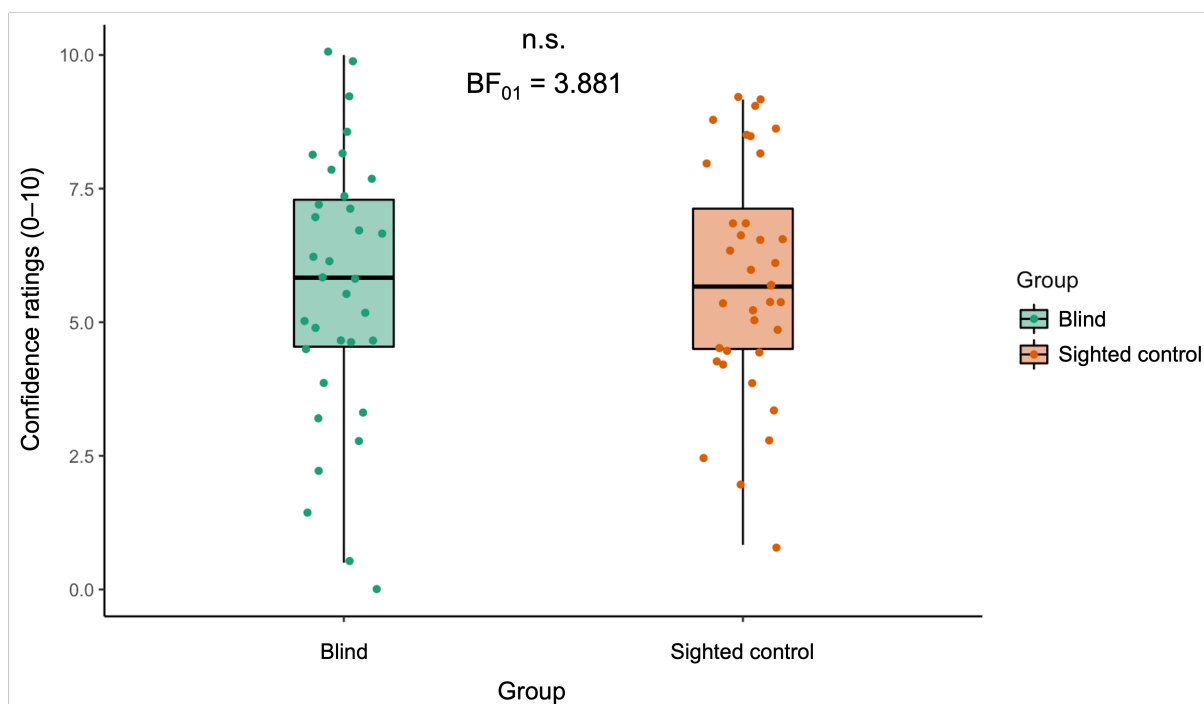

327



328 **Figure 4.** There was no difference between the blind and sighted control groups in the average  
329 confidence ratings.

330

### 331 **Belief of performance accuracy**

332

333 We found no difference between the blind and sighted control groups in regard to their  
334 belief in the performance of accuracy, for both completion before the task ( $W = 460.5$ ,  $p =$   
335  $0.075$ ,  $BF_{01} = 1.129$ ;  $M_{\text{Blind}} = 50.588$ ,  $SD_{\text{Blind}} = 27.900$ ,  $M_{\text{Control}} = 61.472$ ,  $SD_{\text{Control}} = 24.455$ )  
336 and completion after the task ( $W = 543$ ,  $p = 0.419$ ,  $BF_{01} = 3.006$ ;  $M_{\text{Blind}} = 51$ ,  $SD_{\text{Blind}} = 26.212$ ,  
337  $M_{\text{Control}} = 56.083$ ,  $SD_{\text{Control}} = 24.450$ ).

338

### 339 **Relationship between interoceptive accuracy and tactile acuity**

340

341 We found no correlation between interoceptive accuracy and tactile acuity in either the  
342 blind ( $\rho = -0.209$ ,  $p = 0.293$ ,  $CI_{95\%} = -0.546-0.185$ ,  $BF_{01} = 1.954$ ) or sighted control ( $\rho = -$   
343  $0.101$ ,  $p = 0.640$ ,  $CI_{95\%} = -0.484-0.316$ ,  $BF_{01} = 2.047$ ) groups (Figure 5).

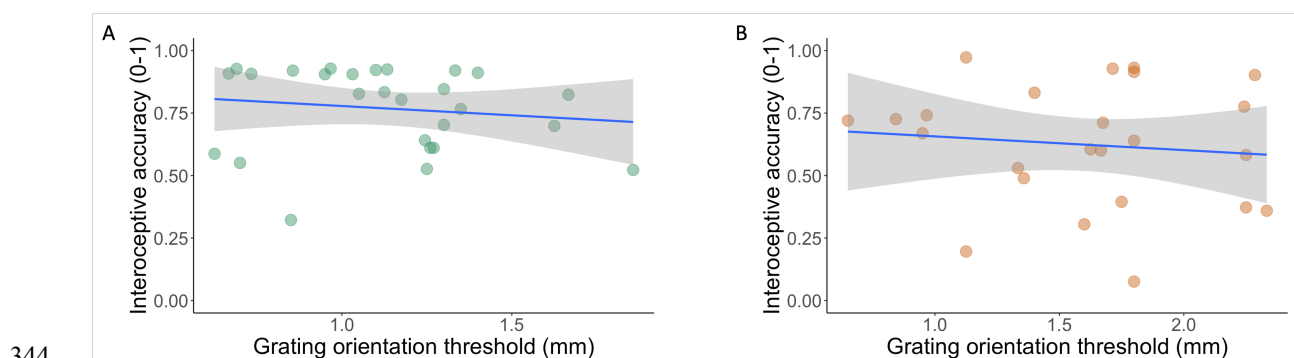

345 **Figure 5.** Correlation between interoceptive accuracy and tactile acuity in the blind (A) and  
346 sighted control (B) groups.

347

## 348 **Discussion**

349

350           In this study, we investigated the effect of blindness on cardiac interoception. Consistent  
351 with our hypothesis, we found that the blind group performed better than the sighted control  
352 group on the heartbeat counting task; that is, that the blind individuals had better cardiac  
353 interoceptive precision compared to the control group. Interestingly, this effect appears to  
354 pertain only to pure sensory abilities; we did not find any differences in regard to interoceptive  
355 sensibility as measured by a subjective questionnaire, namely, the MAIA. We also did not find  
356 differences in confidence in the given response or belief of performance accuracy, which were  
357 measured both before and after task completion. We did not find any differences in heart rate  
358 either, which excludes the possibility that the observed effect was due to a potential discrepancy  
359 between the groups occurring at the physiological level. Taken together, our results suggest that  
360 blind people are better able to sense their own heartbeats compared to their sighted counterparts.

361           The reasons behind our main result could be twofold. On the one hand, this result could  
362 reflect a genuinely increased perceptual ability to use the visceral information from rhythmic  
363 cardiovascular events felt in the chest, which leads to a more accurate counting of heartbeats.  
364 This is the most straightforward and the most likely interpretation, especially considering the  
365 results of the tactile control task. An alternative interpretation that we cannot exclude is that  
366 blind individuals showed a more accurate performance in the task because they were better at  
367 sensing pulsations from different locations in their body (see also Betka et al., 2021) and picking  
368 up subtle cues from forehead, limbs, etc., thus relying more on multisensory integration of  
369 various somatosensory and interoceptive signals related to the heartbeats rather than sensory  
370 signals from the heart that are mediated through the vagal nerve (Prescott & Liberles, 2022).  
371 Future studies should investigate this further; however, in either case and regardless of the  
372 underlying sensory mechanism, the current results are important because they suggest that in  
373 general, blind individuals are better at perceiving their heartbeats than sighted individuals.

374           What kind of mechanism could trigger the kind of cross-modal plasticity that would  
375 lead to improvements in cardiac interoception? Several studies with blind individuals have  
376 suggested that their improved sensory acuity is not necessarily driven by the lack of vision  
377 itself, but rather due to the experience-dependent neuroplastic mechanisms—caused by, for  
378 example, the increased training of the hands due to tactile exploration of everyday objects and  
379 Braille reading (Alary et al., 2009; Sathian & Stilla, 2010, Voss, 2011; Wong et al., 2011).  
380 However, such an explanation seems unlikely for the enhancements in cardiac interoceptive  
381 accuracy observed in our study. Tactile training among blind individuals is predominantly  
382 involuntary and associated with exploring the environment and performing various daily  
383 activities, while interoceptive functions are usually not trained in this way. A potential  
384 interoceptive equivalent of tactile training could be the practice of meditation. However,  
385 previous research has suggested that regular meditation does not lead to superior interoceptive  
386 accuracy (e.g., Khalsa et al., 2008; Khalsa, Rudrauf, Hassanpour, Davidson, & Tranel, 2020;  
387 see also Farb, Segal, & Anderson, 2013). Given that the experience-dependent explanation of  
388 the effect observed in our study seems unlikely, the results fit better in the theoretical framework  
389 of massive cross-modal plasticity occurring because of visual deprivation itself. In this view,  
390 the lack of visual experience leads to neuroplastic changes in sensory, multisensory, and visual  
391 areas and their anatomical interconnections that provide greater neural processing capacities for  
392 the remaining senses, including cardiac interoception, as has been revealed by the current  
393 results. The fact that such massive cross-modal plasticity effects go beyond the exteroceptive  
394 senses of hearing, discriminative touch, and olfaction to include sensations from an inner  
395 visceral organ is particularly noteworthy, as it advances our understanding of the extent of such  
396 effects and related perceptual enhancements.

397           What could be the neuroanatomical basis for the current findings of enhanced cardiac  
398 interoceptive accuracy? One of the regions that is important for the processing of afferent

399 visceral information, including cardiac signals, is the anterior insula (see Critchley et al., 2004).  
400 Interestingly, visual deprivation has recently been found to reshape the functional architecture  
401 within anterior insular subregions (Liu et al., 2017). Although it is not clear how these  
402 neuroplastic changes are related to the ability to perceive heartbeats or other visceral signals,  
403 future neuroimaging studies could explore this possible link. Furthermore, the observed  
404 enhancement could also be due to structural changes within the deprived occipital cortex.  
405 Indeed, previous studies have reported a relationship between increased occipital cortical  
406 thickness and enhanced performance within the auditory modality (Voss & Zatorre, 2012).  
407 Future studies might elucidate the relationship between structural changes in the brains of blind  
408 individuals and their superior performance in sensory tasks.

409 Future studies should also investigate to what extent the current findings are  
410 generalizable to other interoceptive submodalities, such as the processing of information from  
411 other inner organs (e.g., bladder and lungs) and including skin-based interoception (see  
412 Crucianelli & Ehrsson, 2022). Interestingly, pain detection thresholds have been found to be  
413 lower in blind individuals, which indicates that they are more sensitive to detecting nociceptive  
414 stimuli on the skin (Slimani et al., 2013; Slimani et al., 2014; Slimani, Ptito, & Kupers, 2015;  
415 Slimani, Plaghki, Ptito, & Kupers, 2016), thereby paralleling findings in animal models of  
416 blindness (Touj, Tokunaga, Al Aïn, Bronchti, & Piché, 2019; Touj, Paquette, Bronchti & Piché,  
417 2021). It has also been proposed that blind individuals might rely more on internal hunger cues  
418 rather than taste in food choices (Gagnon, Kupers, & Ptito, 2013). Although it may suggest that  
419 the current findings could be generalizable, recent studies in sighted individuals have found that  
420 perceptual abilities on different interoceptive tasks that probe different submodalities are  
421 independent and uncorrelated (Garfinkel et al., 2016b; Ferentzi et al., 2018; Crucianelli,  
422 Enmalm, & Ehrsson, 2021) and that cardiac interoceptive accuracy does not correlate  
423 significantly with accuracy measures in skin-based interoceptive tasks (Crucianelli et al., 2021).

424 Thus, to obtain a more complete picture of how visual deprivation affects interception, future  
425 studies should employ a battery of tests and investigate how different interoceptive  
426 submodalities are affected by visual deprivation and if some are more influenced than others.

427 Surprisingly, in our study, we did not observe a significant correlation between  
428 interoceptive accuracy and interoceptive sensibility (as measured by confidence ratings) in  
429 blind individuals, although the Bayesian analysis suggested that this result could be  
430 inconclusive. In the sighted group, in turn, this correlation was positive, significant and  
431 supported by Bayesian statistics. In previous studies, higher levels of interoceptive accuracy  
432 have been associated with higher interoceptive awareness and lower interoceptive accuracy  
433 with no relationship between accuracy and sensibility (e.g., Garfinkel et al., 2015; García-  
434 Cordero et al., 2016; Murphy, Catmur, & Bird, 2018). In other words, healthy sighted people  
435 who do well on the heartbeat counting task also have a metacognitive awareness that they are  
436 doing well, whereas individuals who perform poorly also do less well in judging how poor their  
437 performance is. The present findings may indicate that this relationship is different in blind  
438 individuals, which suggests a lowered insight into sensory abilities. This would also be  
439 consistent with the results from the MAIA questionnaire that suggested no differences in how  
440 the blind and sighted participants rated a range of sensations related to various aspects of  
441 interoception in their daily life. However, Beaulieu-Lefebvre and colleagues (2011) reported  
442 that blind individuals scored higher than sighted individuals on a scale that assessed sensibility  
443 to olfactory sensations, although subsequent studies did not find conclusive evidence for the  
444 difference between blind and sighted individuals in metacognitive abilities in relation to  
445 olfactory task performance (Cornell Kärnekull, Arshamian, Nilsson, & Larsson, 2016). Future  
446 studies should try to clarify whether insight into perceptual abilities among blind people varies  
447 between interoceptive and exteroceptive senses.

448           It is well known that internal bodily signals—cardiac signals in particular—are in a  
449 mutual interactive relationship with emotion processing (see Pollatos, Gramann, & Schandry,  
450 2007; Critchley & Harrison, 2013; Adolfi et al., 2016; Garfinkel & Critchley, 2016c; Critchley  
451 & Garfinkel, 2017; Shah, Catmur, & Bird, 2017). Changes in afferent interoceptive inputs from  
452 the heart modulate subjective emotions (e.g., the intensity of experience fear; see Garfinkel et  
453 al., 2014), and changes in emotion can trigger various physiological peripheral reactions in the  
454 body (e.g., increasing heart rate), which in turn modulate the ascending interoceptive signals in  
455 the brain. Thus, enhanced cardiac interoception in blind individuals may modulate these body-  
456 brain interactions and lead to changes in emotional processing. Furthermore, it has been  
457 suggested that the degree to which an individual is able to recognize their own interoceptive  
458 states positively correlates with how well they recognize emotions in themselves and in others  
459 (Wiens, Mezzacappa, & Katkin, 2000; Herbert, Pollatos, & Schandry, 2007; Terasawa,  
460 Moriguchi, Tochizawa, & Umeda, 2014; Ernst et al., 2014; Shah, Hall, Catmur, & Bird, 2016;  
461 Bird, Shah, & Catmur, 2017; Tsakiris, 2017; but see also Ainley, Maister, & Tsakiris, 2015).  
462 Blind individuals do not show impairments in emotion processing (Gamond, Vecchi, Ferrari,  
463 Merabet, & Cattaneo, 2017); moreover, they show better discrimination of emotional  
464 information, along with increased amygdala activation to emotional auditory stimuli (Klinge,  
465 Röder, & Büchel, 2010; Klinge, Röder, & Büchel, 2013), where the amygdala, along with the  
466 insula, is one of the critical structures for interoception and emotion processing (Critchley,  
467 Mathias, & Dolan, 2002). Therefore, our results could provide a missing explanatory link  
468 between improved emotional processing and increased sensory acuity in the blind.

469           Our results could also have important implications for future research on bodily  
470 awareness and self-consciousness in the blind. Heartbeats are one of the first sensory cues  
471 during early development, occurring after 5 ½ to 6 weeks after gestation; even young infants  
472 seem to perceive their own heartbeats, as demonstrated in behavioral paradigms (Maister, Tang,

473 & Tsakiris, 2017; but see also Weijs, Daum, & Lenggenhager, 2022). Thus, together with  
474 proprioceptive feedback from movements, cardiac interoceptive signals may play an important  
475 role in the developing central nervous system in regard to laying the foundation for sensory  
476 processing and the sense of self (see also Quigley, Kanoski, Grill, Feldman Barrett, & Tsakiris,  
477 2021). In sighted individuals, visual experience later becomes crucial when the infant learns to  
478 interact with external objects and recognizes their own body parts through movement and  
479 visuotactile feedback (Rochat & Striano, 2000; Zmyj, Jank, Schütz-Bosbach, & Daum, 2011;  
480 Chen, Lewis, Shore, Spence, & Maurer, 2018). These visual experiences of the self and the  
481 world presumably drive the development of a multisensory sense of the bodily self (Bremner,  
482 2016); however, in blind individuals who lack this kind of information, interoception may play  
483 a relatively greater role. It has been shown that congenitally blind individuals exhibit changes  
484 in the multisensory representation of their own body (Petkova, Zetterberg, & Ehrsson, 2012;  
485 Nava, Steiger, & Röder, 2014). Thus, the current findings might be important for future research  
486 into how bodily awareness and self-consciousness develop and are maintained without vision  
487 and how enhanced ability to sense cardiac signals may modulate bodily awareness and self-  
488 consciousness in the blind.

489         In conclusion, we have conducted the first study on cardiac interoceptive abilities in  
490 blind individuals and found that blind individuals are better than their sighted counterparts at  
491 sensing their own heartbeats in the classic heartbeat counting task. The results can contribute  
492 to our understanding of the fundamental constraints of massive cross-modal plasticity after  
493 blindness by suggesting that visual deprivation leads to interoceptive plasticity, which may have  
494 interesting potential implications for emotional processing, bodily awareness, and the conscious  
495 experience of the self.

496

## 497 **Acknowledgments**

498

499 We thank Adam Enmalm for his assistance in data collection during the pilot stage of  
500 the study.

501

## 502 **Funding**

503

504 This work was supported by the Polish National Science Centre (NCN; grant no:  
505 2018/30/A/HS6/00595) and Swedish Research Council (VR; grant no: 2017-03135). Laura  
506 Crucianelli was supported by the Marie Skłodowska-Curie Intra-European Individual  
507 Fellowship (grant no: 891175). The funding sources were not involved in the study design,  
508 collection, analyses and interpretation of the data or in the writing of this paper.

509

## 510 **Competing Interests**

511

512 The authors declare no competing interests.

513

## 514 **References**

515

- 516 Adolfi, F., Couto, B., Richter, F., Decety, J., Lopez, J., Sigman, M., Manes, F., & Ibáñez, A.  
517 (2016). Convergence of interoception, emotion, and social cognition: A twofold fMRI meta-  
518 analysis and lesion approach. *Cortex*, *88*, 124-142.
- 519 Ainley, V., Maister, L., & Tsakiris, M. (2015). Heartfelt empathy? No association between  
520 interoceptive awareness, questionnaire measures of empathy, reading the mind in the eyes task  
521 or the director task. *Frontiers in Psychology*, *6*, 554.
- 522 Alary, F., Duquette, M., Goldstein, R., Chapman, C. E., Voss, P., La Buissonnière-Ariza, V.,  
523 & Lepore, F. (2009). Tactile acuity in the blind: a closer look reveals superiority over the  
524 sighted in some but not all cutaneous tasks. *Neuropsychologia*, *47*(10), 2037-2043.
- 525 Ardizzi, M., Ambrosecchia, M., Buratta, L., Ferri, F., Peciccia, M., Donnari, S., ... & Gallese,  
526 V. (2016). Interoception and positive symptoms in schizophrenia. *Frontiers in Human*  
527 *Neuroscience*, *10*, 379.



- 528 Battal, C., Occelli, V., Bertonati, G., Falagiarda, F., & Collignon, O. (2020). General  
529 enhancement of spatial hearing in congenitally blind people. *Psychological Science*, *31*(9),  
530 1129-1139.
- 531 Bauer, C., Yazzolino, L., Hirsch, G., Cattaneo, Z., Vecchi, T., & Merabet, L. B. (2015). Neural  
532 correlates associated with superior tactile symmetry perception in the early blind. *Cortex*, *63*,  
533 104-117.
- 534 Beaulieu-Lefebvre, M., Schneider, F. C., Kupers, R., & Ptito, M. (2011). Odor perception and  
535 odor awareness in congenital blindness. *Brain Research Bulletin*, *84*(3), 206-209.
- 536 Betka, S., Łukowska, M., Silva, M., King, J., Garfinkel, S., & Critchley, H. (2021). Evidence  
537 toward the potential absence of relationship between temporal and spatial heartbeats perception.  
538 *Scientific Reports*, *11*(1), 1-14.
- 539 Bird, G., Shah, P., & Catmur, C. (2017). From heart to mind: Linking interoception, emotion,  
540 and theory of mind. *Cortex*, *93*, 220-223.
- 541 Björnsdotter, M., Morrison, I., & Olausson, H. (2010). Feeling good: on the role of C fiber  
542 mediated touch in interoception. *Experimental Brain Research*, *207*(3), 149-155.
- 543 Bremner, A. J. (2016). Developing body representations in early life: combining  
544 somatosensation and vision to perceive the interface between the body and the world.  
545 *Developmental Medicine & Child Neurology*, *58*, 12-16.
- 546 Brytek-Matera, A., & Koziel, A. (2015). The body self-awareness among women practicing  
547 fitness: a preliminary study. *Polish Psychological Bulletin*, *46*(1), 104-111.
- 548 Chen, Y. C., Lewis, T. L., Shore, D. I., Spence, C., & Maurer, D. (2018). Developmental  
549 changes in the perception of visuotactile simultaneity. *Journal of Experimental Child*  
550 *Psychology*, *173*, 304-317.
- 551 Cuevas, I., Plaza, P., Rombaux, P., Collignon, O., De Volder, A. G., & Renier, L. (2010). Do  
552 people who became blind early in life develop a better sense of smell? A psychophysical study.  
553 *Journal of Visual Impairment & Blindness*, *104*(6), 369-379.
- 554 Cornell Kärnekull, S., Arshamian, A., Nilsson, M. E., & Larsson, M. (2016). From perception  
555 to metacognition: auditory and olfactory functions in early blind, late blind, and sighted  
556 individuals. *Frontiers in Psychology*, *7*, 1450.
- 557 Craig, A. D. (2002). How do you feel now? Interoception: the sense of the physiological  
558 condition of the body. *Nature Reviews Neuroscience*, *3*, 655e666.
- 559 Critchley, H. D., Mathias, C. J., & Dolan, R. J. (2002). Fear conditioning in humans: The  
560 influence of awareness and autonomic arousal on functional neuroanatomy. *Neuron*, *33*(4),  
561 653-663.
- 562 Critchley, H. D., Weins, S., Rohstein, P., Öhman, A., & Dolan, R. J. (2004). Neural systems  
563 supporting interoceptive awareness. *Nature Neuroscience*, *7*(2), 189-195.
- 564 Critchley, H., & Harrison, N. (2013). Visceral Influences on Brain and Behavior. *Neuron*, *77*(4),  
565 624-638.
- 566 Critchley, H. D., & Garfinkel, S. N. (2017). Interoception and emotion. *Current Opinion in*  
567 *Psychology*, *17*, 7-14.
- 568 Crucianelli, L., Enmalm, A., & Ehrsson, H. H. (2021). Probing interoception via  
569 thermosensation: No specific relationships across multiple interoceptive sub-modalities.  
570 *bioRxiv*
- 571 Crucianelli, L., & Ehrsson, H. H. (2022). The role of the skin in interoception: A neglected  
572 organ? *PsyArXiv*
- 573 Ernst, J., Böker, H., Hättenschwiler, J., Schüpbach, D., Northoff, G., Seifritz, E., & Grimm, S.  
574 (2014). The association of interoceptive awareness and alexithymia with neurotransmitter  
575 concentrations in insula and anterior cingulate. *Social Cognitive and Affective Neuroscience*,  
576 *9*(6), 857-8663.

- 577 Farb, N. A., Segal, Z. V., & Anderson, A. K. (2013). Mindfulness meditation training alters  
578 cortical representations of interoceptive attention. *Social Cognitive and Affective Neuroscience*,  
579 8(1), 15-26.
- 580 Ferentzi, E., Bogdány, T., Szabolcs, Z., Csala, B., Horváth, Á., & Köteles, F. (2018).  
581 Multichannel investigation of interoception: Sensitivity is not a generalizable feature. *Frontiers*  
582 *in Human Neuroscience*, 12, 223.
- 583 Fleming, S. M., Massoni, S., Gajdos, T., & Vergnaud, J. C. (2016). Metacognition about the  
584 past and future: quantifying common and distinct influences on prospective and retrospective  
585 judgments of self-performance. *Neuroscience of Consciousness*, 2016(1).
- 586 Fotopoulou, A., & Tsakiris, M. (2017). Mentalizing homeostasis: the social origins of  
587 interoceptive inference. *Neuropsychanalysis*, 19(1), 71–76.
- 588 Frasnelli, J., Collignon, O., Voss, P., & Lepore, F. (2011). Crossmodal plasticity in sensory  
589 loss. *Progress in Brain Research*, 191, 233–249.
- 590 Gagnon, L., Kupers, R., & Ptito, M. (2013). Reduced taste sensitivity in congenital blindness.  
591 *Chemical Senses*, 38(6), 509-517.
- 592 Gamond, L., Vecchi, T., Ferrari, C., Merabet, L. B., & Cattaneo, Z. (2017). Emotion processing  
593 in early blind and sighted individuals. *Neuropsychology*, 31(5), 516-524.
- 594 García-Cordero, I., Sedeño, L., De La Fuente, L., Slachevsky, A., Forno, G., Klein, F., ... &  
595 Ibañez, A. (2016). Feeling, learning from and being aware of inner states: interoceptive  
596 dimensions in neurodegeneration and stroke. *Philosophical Transactions of the Royal Society*  
597 *B: Biological Sciences*, 371(1708), 20160006.
- 598 Garfinkel, S. N., Minati, L., Gray, M. A., Seth, A. K., Dolan, R. J., & Critchley, H. D. (2014).  
599 Fear from the heart: sensitivity to fear stimuli depends on individual heartbeats. *Journal of*  
600 *Neuroscience*, 34(19), 6573-6582.
- 601 Garfinkel, S. N., Seth, A. K., Barrett, A. B., Suzuki, K., & Critchley, H. D. (2015). Knowing  
602 your own heart: Distinguishing interoceptive accuracy from interoceptive awareness.  
603 *Biological Psychology*, 104, 65-74.
- 604 Garfinkel, S. N., Tiley, C., O'Keeffe, S., Harrison, N. A., Seth, A. K., & Critchley, H. D.  
605 (2016a). Discrepancies between dimensions of interoception in autism: Implications for  
606 emotion and anxiety. *Biological Psychology*, 114, 117-126.
- 607 Garfinkel, S. N., Manassei, M. F., Hamilton-Fletcher, G., In den Bosch, Y., Critchley, H. D., &  
608 Engels, M. (2016b). Interoceptive dimensions across cardiac and respiratory axes.  
609 *Philosophical Transactions of the Royal Society B: Biological Sciences*, 371(1708), 20160014.
- 610 Garfinkel, S. N., & Critchley, H. D. (2016c). Threat and the Body: How the Heart Supports  
611 Fear Processing. *Trends in Cognitive Sciences*, 20(1), 34-46.
- 612 Goldreich, D., & Kanics, I. M. (2003). Tactile acuity is enhanced in blindness. *Journal of*  
613 *Neuroscience*, 23(8), 3439-3445.
- 614 Goldreich, D., & Kanics, I. M. (2006). Performance of blind and sighted humans on a tactile  
615 grating detection task. *Perception & Psychophysics*, 68(8), 1363-1371.
- 616 Gougoux, F., Lepore, F., Lassonde, M., Voss, P., Zatorre, R. J., & Belin, P. (2004). Pitch  
617 discrimination in the early blind. *Nature*, 430(6997), 309-309.
- 618 Hartley, T. R., Lovallo, W. R., & Whitsett, T. L. (2004). Cardiovascular effects of caffeine in  
619 men and women. *The American Journal of Cardiology*, 93(8), 1022-1026.
- 620 Herbert, B. M., Pollatos, O., & Schandry, R. (2007). Interoceptive sensitivity and emotion  
621 processing: An EEG study. *International Journal of Psychophysiology*, 65(3), 214-27.
- 622 Herbert, B. M., & Pollatos, O. (2012). The body in the mind: on the relationship between  
623 interoception and embodiment. *Topics in Cognitive Science*, 4(4), 692-704.
- 624 Jakubczyk, A., Skrzyszewski, J., Trucco, E. M., Suszek, H., Zaorska, J., Nowakowska, M., ...  
625 & Kopera, M. (2019). Interoceptive accuracy and interoceptive sensibility in individuals with

- 626 alcohol use disorder—Different phenomena with different clinical correlations? *Drug and*  
627 *Alcohol Dependence*, 198, 34-38.
- 628 Jarosz, A. F., & Wiley, J. (2014). What are the odds? A practical guide to computing and  
629 reporting Bayes factors. *The Journal of Problem Solving*, 7(1), 2.
- 630 Johnson, K. O., & Phillips, J. R. (1981). Tactile spatial resolution. I. Two-point discrimination,  
631 gap detection, grating resolution, and letter recognition. *Journal of Neurophysiology*, 46(6),  
632 1177-1192.
- 633 Kirsch, L. P., Mathys, C., Papadaki, C., Talelli, P., Friston, K., Moro, V., & Fotopoulou, A.  
634 (2021). Updating beliefs beyond the here-and-now: the counter-factual self in anosognosia for  
635 hemiplegia. *Brain Communications*, 3(2).
- 636 Khalsa, S. S., Rudrauf, D., Damasio, A. R., Davidson, R. J., Lutz, A., & Tranel, D. (2008).  
637 Interoceptive awareness in experienced meditators. *Psychophysiology*, 45(4), 671-677.
- 638 Khalsa, S. S., et al. (2018). Interoception and Mental Health: A Roadmap. *Biological*  
639 *Psychiatry: CNI*, 3, 501-513.
- 640 Khalsa, S. S., Rudrauf, D., Hassanpour, M. S., Davidson, R. J., & Tranel, D. (2020). The  
641 practice of meditation is not associated with improved interoceptive awareness of the heartbeat.  
642 *Psychophysiology*, 57(2), e13479.
- 643 Klinge, C., Röder, B., & Büchel, C. (2010). Increased amygdala activation to emotional  
644 auditory stimuli in the blind. *Brain*, 133(6), 1729-1736.
- 645 Klinge, C., Röder, B., & Büchel, C. (2013). Does training or deprivation modulate amygdala  
646 activation? *NeuroImage*, 59(2), 1765-1771.
- 647 Knapp-Kline, K., Ring, C., Emmerich, D., & Brener, J. (2021). The effects of vibrotactile  
648 masking on heartbeat detection: evidence that somatosensory mechanoreceptors transduce  
649 heartbeat sensations. *Psychophysiology*, 58(6), e13817.
- 650 Lee, M. D., and Wagenmakers, E. J. (2014). *Bayesian Cognitive Modeling: A Practical Course*.  
651 Cambridge: Cambridge University Press.
- 652 Lessard, N., Paré, M., Lepore, F., & Lassonde, M. (1998). Early-blind human subjects localize  
653 sound sources better than sighted subjects. *Nature*, 395(6699), 278-280.
- 654 Liu, L., Yuan, C., Ding, H., Xu, Y., Long, M., Li, Y. J., Liu, Y., Jiang, T., Qin, W., Shen, W.,  
655 & Yu, C. (2017). Visual deprivation selectively reshapes the intrinsic functional architecture of  
656 the anterior insula subregions. *Scientific Reports*, 7(1).
- 657 Macefield, V. G. (2003). Cardiovascular and respiratory modulation of tactile afferents in the  
658 human finger pad. *Experimental Physiology*, 88(5), 617-625.
- 659 Mai, S., Wong, C. K., Georgiou, E., & Pollatos, O. (2018). Interoception is associated with  
660 heartbeat-evoked brain potentials (HEPs) in adolescents. *Biological Psychology*, 137, 24-33.
- 661 Maister, L., Tang, T., & Tsakiris, M. (2017). Neurobehavioral evidence of interoceptive  
662 sensitivity in early infancy. *eLife*, 6, e25318.
- 663 McMullen, M. K., Whitehouse, J. M., Shine, G., Whitton, P. A., & Towell, A. (2012). Caffeine  
664 in hot drinks elicits cephalic phase responses involving cardiac activity. *Food & Function*, 3(9),  
665 931-940.
- 666 Mehling, W. E., Price, C., Daubenmier, J. J., Acree, M., Bartmess, E., & Stewart, A. (2012).  
667 The Multidimensional Assessment of Interoceptive Awareness (MAIA). *PLoS ONE*, 7(11),  
668 e48230.
- 669 Merabet, L. B., Hamilton, R., Schlaug, G., Swisher, J. D., Kiriakopoulos, E. T., Pitskel, N. B.,  
670 ... & Pascual-Leone, A. (2008). Rapid and reversible recruitment of early visual cortex for  
671 touch. *PLoS ONE*, 3(8), e3046.
- 672 Merabet, L. B., & Pascual-Leone, A. (2010). Neural reorganization following sensory loss: The  
673 opportunity of change. *Nature Reviews Neuroscience*, 11(1), 44-52.

- 674 Murphy, J., Catmur, C., & Bird, G. (2018). Alexithymia is associated with a multidomain,  
675 multidimensional failure of interoception: Evidence from novel tests. *Journal of Experimental*  
676 *Psychology: General*, 147(3), 398.
- 677 Nava, E., Steiger, T., & Röder, B. (2014). Both developmental and adult vision shape body  
678 representations. *Scientific Reports*, 4(1), 1-8.
- 679 Palser, E. R., Fotopoulou, A., Pellicano, E., & Kilner, J. M. (2018). The link between  
680 interoceptive processing and anxiety in children diagnosed with autism spectrum disorder:  
681 Extending adult findings into a developmental sample. *Biological Psychology*, 136, 13-21.
- 682 Palser, E. R., Fotopoulou, A., Pellicano, E., & Kilner, J. M. (2020). Dissociation in how core  
683 autism features relate to interoceptive dimensions: evidence from cardiac awareness in children.  
684 *Journal of Autism and Developmental Disorders*, 50(2), 572-582.
- 685 Petkova, V. I., Zetterberg, H., & Ehrsson, H. H. (2012). Rubber hands feel touch, but not in  
686 blind individuals. *PloS one*, 7(4), e35912.
- 687 Pollatos, O., Gramann, K., & Schandry, R. (2007). Neural systems connecting interoceptive  
688 awareness and feelings. *Human Brain Mapping*, 28(1), 9-18.
- 689 Pollatos, O., Herbert, B. M., Kaufmann, C., Auer, D. P., & Schandry, R. (2007). Interoceptive  
690 awareness, anxiety and cardiovascular reactivity to isometric exercise. *International Journal of*  
691 *Psychophysiology*, 65(2), 167-173.
- 692 Prescott, S. L., & Liberles, S. D. (2022). Internal senses of the vagus nerve. *Neuron*.
- 693 Purves, D., Augustine, G. J., Fitzpatrick, D., Hall, W. C., Lamantia, A.-S., Mooney, R. D., Platt,  
694 M. L., & White, L. E. (2019). Neuroscience. Oxford: Oxford University Press.
- 695 Quigley, K. S., Kanoski, S., Grill, W. M., Barrett, L. F., & Tsakiris, M. (2021). Functions of  
696 interoception: From energy regulation to experience of the self. *Trends in Neurosciences*, 44(1),  
697 29-38.
- 698 Radziun, D., Crucianelli, L., & Ehrsson, H. H. (2021). Limits of cross-modal plasticity? Short-  
699 term visual deprivation does not enhance cardiac interoception, thermosensation, or tactile  
700 spatial acuity. *Biological Psychology*, 108248.
- 701 Rae, C. L., Larsson, D. E., Garfinkel, S. N., & Critchley, H. D. (2019). Dimensions of  
702 interoception predict premonitory urges and tic severity in Tourette syndrome. *Psychiatry*  
703 *Research*, 271, 469-475.
- 704 Rochat, P., & Striano, T. (2000). Perceived self in infancy. *Infant Behavior and Development*,  
705 23(3-4), 513-530.
- 706 Röder, B., Teder-Sälejärvi, W., Sterr, A., Rösler, F., Hillyard, S. A., & Neville, H. J. (1999).  
707 Improved auditory spatial tuning in blind humans. *Nature*, 400(6740), 162-166.
- 708 Renier, L., De Volder, A. G., & Rauschecker, J. P. (2014). Cortical plasticity and preserved  
709 function in early blindness. *Neuroscience & Biobehavioral Reviews*, 41, 53-63.
- 710 Sathian, K., & Stilla, R. (2010). Cross-modal plasticity of tactile perception in blindness.  
711 *Restorative Neurology and Neuroscience*, 28(2), 271-281.
- 712 Schandry, R. (1981). Heart Beat Perception and Emotional Experience. *Psychophysiology*,  
713 18(4), 483-488.
- 714 Sorokowska, A. (2016). Olfactory performance in a large sample of early-blind and late-blind  
715 individuals. *Chemical Senses*, 41(8), 703-709.
- 716 Shah, P., Hall, R., Catmur, C., & Bird, G. (2016). Alexithymia, not autism, is associated with  
717 impaired interoception. *Cortex*, 8, 215-220.
- 718 Shah, P., Catmur, C., & Bird, G. (2017). From heart to mind: Linking interoception, emotion,  
719 and theory of mind. *Cortex*, 93, 220-223.
- 720 Sherrington, C.S. (1948). *The Integrative Action of the Nervous System*. Cambridge, UK:  
721 Cambridge University Press.
- 722 Singh, A. K., Phillips, F., Merabet, L. B., & Sinha, P. (2018). Why does the cortex reorganize  
723 after sensory loss? *Trends in Cognitive Sciences*, 22(7), 569-582.



- 724 Slimani, H., Danti, S., Ricciardi, E., Pietrini, P., Ptito, M., & Kupers, R. (2013).  
725 Hypersensitivity to pain in congenital blindness. *Pain*, *154*(10), 1973–1978.
- 726 Slimani, H., Danti, S., Ptito, M., & Kupers, R. (2014). Pain Perception Is Increased in  
727 Congenital but Not Late Onset Blindness. *PLoS ONE*, *9*(9).
- 728 Slimani, H., Ptito, M., & Kupers, R. (2015). Enhanced heat discrimination in congenital  
729 blindness. *Behavioural Brain Research*, *283*, 233–237.
- 730 Slimani, H., Plaghki, L., Ptito, M., & Kupers, R. (2016). Pain hypersensitivity in congenital  
731 blindness is associated with faster central processing of C-fibre input. *European Journal of*  
732 *Pain*, *20*(9), 1519–1529.
- 733 Suksasilp, C., & Garfinkel, S. N. (2022). Towards a comprehensive assessment of interoception  
734 in a multi-dimensional framework. *Biological Psychology*, 108262.
- 735 Terasawa, Y., Moriguchi, Y., Tochizawa, S. & Umeda, S. (2014). Interoceptive sensitivity  
736 predicts sensitivity to the emotions of others. *Cognition and Emotion*, *28*(8), 1435-1448.
- 737 Touj, S., Tokunaga, R., Al Aïn, S., Bronchti, G., & Piché, M. (2019). Pain hypersensitivity is  
738 associated with increased amygdala volume and c-Fos immunoreactivity in anophthalmic mice.  
739 *Neuroscience*, *418*, 37-49.
- 740 Touj, S., Paquette, T., Bronchti, G., & Piché, M. (2021). Early and late visual deprivation induce  
741 hypersensitivity to mechanical and thermal noxious stimuli in the ZRDBA mouse. *European*  
742 *Journal of Pain*, *25*(10), 2257-2265.
- 743 Tsakiris, M. (2017). The multisensory basis of the self: From body to identity to others.  
744 *Quarterly Journal of Experimental Psychology*, *70*(4), 597-609.
- 745 Van Boven, R. W., & Johnson, K. O. (1994). A psychophysical study of the mechanisms of  
746 sensory recovery following nerve injury in humans. *Brain*, *117*(1), 149-167.
- 747 Von Mohr, M., Finotti, G., Villani, V., & Tsakiris, M. (2021). Taking the pulse of social  
748 cognition: cardiac afferent activity and interoceptive accuracy modulate emotional  
749 egocentricity bias. *Cortex*, *145*, 327-340.
- 750 Voss, P., Lassonde, M., Gougoux, F., Fortin, M., Guillemot, J. P., & Lepore, F. (2004). Early-  
751 and late-onset blind individuals show supra-normal auditory abilities in far-space. *Current*  
752 *Biology*, *14*(19), 1734-1738.
- 753 Voss, P. (2011). Superior tactile abilities in the blind: Is blindness required? *Journal of*  
754 *Neuroscience*, *31*(33), 11745-11747.
- 755 Voss, P., & Zatorre, R. J. (2012). Occipital cortical thickness predicts performance on pitch and  
756 musical tasks in blind individuals. *Cerebral Cortex*, *22*(11), 2455-2465.
- 757 Wan, C. Y., Wood, A. G., Reutens, D. C., & Wilson, S. J. (2010). Congenital blindness leads  
758 to enhanced vibrotactile perception. *Neuropsychologia*, *48*(2), 631-635.
- 759 Weijs, M. L., Daum, M. M., & Lenggenhager, B. (2022). Cardiac Interoception in Infants:  
760 Behavioral and Neurophysiological Measures in Various Emotional and Self-Related Contexts.  
761 *PsyArXiv*
- 762 Wiens, S., Mezzacappa, E. S., & Katkin, E. S. (2000). Heartbeat detection and the experience  
763 of emotions. *Cognition and Emotion*, *14*(3), 417-427.
- 764 Wong, M., Gnanakumaran, V., & Goldreich, D. (2011). Tactile spatial acuity enhancement in  
765 blindness: evidence for experience-dependent mechanisms. *Journal of Neuroscience*, *31*(19),  
766 7028-7037.
- 767 Zamariola, G., Maurage, P., Luminet, O., & Corneille, O. (2018). Interoceptive accuracy scores  
768 from the heartbeat counting task are problematic: Evidence from simple bivariate correlations.  
769 *Biological Psychology*, *137*, 12-17.
- 770 Zmyj, N., Jank, J., Schütz-Bosbach, S., & Daum, M. M. (2011). Detection of visual–tactile  
771 contingency in the first year after birth. *Cognition*, *120*(1), 82-89.
